# Supplementary material for: A quantitative modelling approach to zebrafish pigment pattern formation
Source: eLife journal article supplement (doi:10.7554/elife.52998), 2020-07-27
Supplement: supp1 [file elife-52998-supp1-v1.pdf]

Supplementary File 1: This table summarises all of the notation used in Appendix 1.

| Symbol                                                            | Description                                                                                                                | Definition                                                                                                                                                                               |
|-------------------------------------------------------------------|----------------------------------------------------------------------------------------------------------------------------|------------------------------------------------------------------------------------------------------------------------------------------------------------------------------------------|
| $M$                                                               | Melanocyte.                                                                                                                |                                                                                                                                                                                          |
| $I^l$                                                             | Loose form iridophore.                                                                                                     |                                                                                                                                                                                          |
| $I^d$                                                             | Dense form iridophore.                                                                                                     |                                                                                                                                                                                          |
| $X^b$                                                             | Xanthoblast.                                                                                                               |                                                                                                                                                                                          |
| $X$                                                               | Xanthophore.                                                                                                               |                                                                                                                                                                                          |
| $\mathbf{X}$                                                      | A representation of the xanthophore layer.                                                                                 | $A \Pi_{\mathbf{X}}^L(t) \times \Pi_{\mathbf{X}}^H(t)$ matrix of $X^b$ 's and zeros.                                                                                                     |
| $\mathbf{M}$                                                      | A representation of the melanocyte layer.                                                                                  | $A \Pi_{\mathbf{M}}^L(t) \times \Pi_{\mathbf{M}}^H(t)$ matrix of $M$ 's and zeros.                                                                                                       |
| $\mathbf{I}$                                                      | A representation of the iridophore layer.                                                                                  | $A \Pi_{\mathbf{I}}^L(t) \times \Pi_{\mathbf{I}}^H(t)$ matrix of $I^l$ 's, $I^d$ 's and zeros.                                                                                           |
| $\Pi_D^L(t)$                                                      | Length of domain type $D \in \{\mathbf{X}, \mathbf{I}, \mathbf{M}\}$ in terms of the number of lattice sites at time $t$ . |                                                                                                                                                                                          |
| $\Pi_D^H(t)$                                                      | Height of domain type $D \in \{\mathbf{X}, \mathbf{I}, \mathbf{M}\}$ in terms of the number of lattice sites at time $t$ . |                                                                                                                                                                                          |
| $\Delta_D$                                                        | Site size of domain type $D \in \{\mathbf{X}, \mathbf{I}, \mathbf{M}\}$ in mm.                                             | $\Delta_D = \begin{cases} 0.04 & \text{for } D = M, \\ 0.02 & \text{for } D = \mathbf{X}, \mathbf{I}. \end{cases}$                                                                       |
| $D(i, j, t)$ where $D \in \{\mathbf{X}, \mathbf{M}, \mathbf{I}\}$ | Occupancy of row $i$ , column $j$ , of matrix representing domain type $D$ at time $t$ .                                   | $D(i, j, t) = \begin{cases} 0 \text{ or } M, & \text{if } D = M \\ 0, X^b \text{ or } X, & \text{if } D = \mathbf{X} \\ 0, I^l \text{ or } I^d, & \text{if } D = \mathbf{I} \end{cases}$ |
| $t$                                                               | Simulated time in minutes.                                                                                                 |                                                                                                                                                                                          |
| $\Omega_H(t)$                                                     | Simulated height at time $t$ in mm.                                                                                        | $\Omega_H(t) = \Pi_D^H(t) \times \Delta_D \quad \forall D \in \{\mathbf{X}, \mathbf{I}, \mathbf{M}\}$ .                                                                                  |
| $\Omega_L(t)$                                                     | Simulated length at time $t$ in mm.                                                                                        | $\Omega_L(t) = \Pi_D^L(t) \times \Delta_D \quad \forall D \in \{\mathbf{X}, \mathbf{I}, \mathbf{M}\}$ .                                                                                  |
| $\Omega_{SL}(t)$                                                  | Simulated Standard Length (SL) at time $t$ in mm.                                                                          | $\Omega_{SL}(t) = \Omega_L(t) + 5.7$ .                                                                                                                                                   |
