# Supplementary material for: A quantitative modelling approach to zebrafish pigment pattern formation
Source: eLife journal article supplement (doi:10.7554/elife.52998), 2020-07-27
Supplement: supp2 [file elife-52998-supp2-v1.pdf]

Supplementary File 2: This table summarises all of the notation used in Appendix 1 regarding short and long range interactions.

| Symbol                                                                        | Description                                                                                                                                                                                                                                                                                                                                                                                               | Definition                                                                                                                                                                                                                                                                                                                                                                                                                                                                                                                                  |
|-------------------------------------------------------------------------------|-----------------------------------------------------------------------------------------------------------------------------------------------------------------------------------------------------------------------------------------------------------------------------------------------------------------------------------------------------------------------------------------------------------|---------------------------------------------------------------------------------------------------------------------------------------------------------------------------------------------------------------------------------------------------------------------------------------------------------------------------------------------------------------------------------------------------------------------------------------------------------------------------------------------------------------------------------------------|
| $S_D(r, k)$                                                                   | Set of site positions that are within distance 0.04 mm from site $D(r, k)$ on domain $D$ (within the Moore neighbourhood). See Figures S??(A) and (B) for examples where $D = M$ , $D = X$ respectively.                                                                                                                                                                                                  | $S_D(r, k) = \begin{cases} \{(i, j) \in (\Pi_D^L, \Pi_D^H) \setminus (r, k) \mid \\ \max\{\min\{ r-i , \Pi_D^H -  r-j \}\} = 1\}, \text{ for } D = M \\ \{(i, j) \in (\Pi_D^L, \Pi_D^H) \setminus (r, k) \mid \\ \max\{\min\{ r-i , \Pi_D^H -  r-j \}\} \leq 2\} \text{ for } D \neq M \end{cases}$                                                                                                                                                                                                                                         |
| $L_D(r, k)$                                                                   | Set of site positions that are distance 0.24mm from site $D(r, k)$ on domain $D$ . See Figures S??(E) and (F) for examples where $D = M$ , $D = X$ respectively.                                                                                                                                                                                                                                          | $L_D(r, k) = \begin{cases} \{(i, j) \in (\Pi_D^L, \Pi_D^H) \setminus (r, k) \mid \\ \max\{\min\{ r-i , \Pi_D^H -  r-j \}\} = 6\}, \text{ for } D = M \\ \{(i, j) \in (\Pi_D^L, \Pi_D^H) \setminus (r, k) \mid \\ \max\{\min\{ r-i , \Pi_D^H -  r-j \}\} = 12\} \text{ for } D \neq M \end{cases}$                                                                                                                                                                                                                                           |
| $S_D^C(r, k, t)$ (Defined only when $C$ lies on $D$ )                         | Set of site positions distance 0.04mm from site $D(r, k)$ on domain $D$ occupied by cell type $C$ at time $t$ . See Figures S??(C) and (D) for examples where $C = M$ , $D = M$ , and $C = X$ , $D = X$ respectively.                                                                                                                                                                                     | $S_D^C(r, k) = \{(i, j) \in S_D(r, k) \mid D(i, j) = C\}$                                                                                                                                                                                                                                                                                                                                                                                                                                                                                   |
| $L_D^C(r, k, t)$ (Defined only when $C$ lies on $D$ )                         | Set of site positions distance 0.24mm from site $D(r, k)$ occupied by cell type $C$ , at time $t$ . See Figures S??(G) and (H) for examples where $C = M$ , $D = M$ , and $C = X$ , $D = X$ respectively.                                                                                                                                                                                                 | $L_D^C(r, k) = \{(i, j) \in L_D(r, k) \mid D(i, j) = C\}$                                                                                                                                                                                                                                                                                                                                                                                                                                                                                   |
| $N_{C_1, C_2}^S(r, k, t)$ , where $C_1$ lies on $D_1$ , $C_2$ lies on $D_2$ . | Number of cells of type $C_2$ that are in the short range distance (0.04mm) from site $D_1(r, k)$ where $D_1(r, k) = C_1$ at time $t$ . See Figures S??(A)-(D) for examples where $(C_1, C_2) = (M, M), (M, X), (X, X), (X, M)$ respectively.                                                                                                                                                             | $N_{C_1, C_2}^S(r, k, t) = \begin{cases} S_{D_2}^{C_2}(r, k, t) \text{ if } D_1 = D_2 \text{ or } D_1 \text{ and } D_2 \in \{X, I\}, \\ \sum_{(i, j) \in S_{D_1}^{C_1}(r, k)} \mathbb{1}_{M\left(\lceil \frac{i}{2} \rceil, \lceil \frac{j}{2} \rceil\right) = M} \text{ if } D_1 \neq M, D_2 = M, \\ \sum_{(i, j) \in S_M^{C_1}(r, k)} \mathbb{1}_{D_2(2i-1, 2j) = C_2} + \mathbb{1}_{D_2(2i-1, 2j) = C_2} + \mathbb{1}_{D_2(2i, 2j-1) = C_2} + \\ \mathbb{1}_{D_2(2i-1, 2j-1) = C_2} \text{ if } D_1 = M, D_2 \neq M. \end{cases}$        |
| $N_{C_1, C_2}^L(r, k, t)$ , where $C_1$ lies on $D_1$ , $C_2$ lies on $D_2$ . | Number of cells of type $C_2$ in long range distance 0.24mm from site $D_1(r, k)$ where $D_1(r, k) = C_2$ at time $t$ . See Figures S??(E)-(H) for examples where $(C_1, C_2) = (M, M), (M, X), (X, X), (X, M)$ respectively.                                                                                                                                                                             | $N_{C_1, C_2}^L(r, k, t) = \begin{cases} L_{D_2}^{C_2}(r, k, t) \text{ where } D_1 = D_2 \text{ or } D_1 \text{ and } D_2 \in \{X, I\}, \\ \sum_{(i, j) \in L_{D_1}^{C_1}(r, k)} \mathbb{1}_{M\left(\lceil \frac{i}{2} \rceil, \lceil \frac{j}{2} \rceil\right) = M} \text{ where } D_1 \neq M, D_2 = M, \\ \sum_{(i, j) \in L_M^{C_1}(r, k)} \mathbb{1}_{D_2(2i, 2j) = C_2} + \mathbb{1}_{D_2(2i-1, 2j) = C_2} + \mathbb{1}_{D_2(2i, 2j-1) = C_2} + \\ \mathbb{1}_{D_2(2i-1, 2j-1) = C_2} \text{ where } D_1 = M, D_2 \neq M. \end{cases}$ |
| $w$                                                                           | Weighting factor for comparing the number of $M$ with a different cell type $C \in \{X, I, J^d, X^b\}$ in the short range (long range) distance from a site on domain $M(r, k)$ . The number of $M$ in this case is multiplied by $w$ to account for the relative size of $M$ to $C$ . See Figures S??(A)-(B), (E)-(F) for examples where this is applicable in the short range, long range respectively. | $w = 4.$                                                                                                                                                                                                                                                                                                                                                                                                                                                                                                                                    |
| $N_C^T(t)$                                                                    | Total number of cells of type $C$ at time $t$ where cell type $C$ lies on domain $D$ .                                                                                                                                                                                                                                                                                                                    | $N_C^T(t) = \sum_{i=1}^{\Pi_D^L(t)} \sum_{j=1}^{\Pi_D^H(t)} \mathbb{1}_{D(i, j) = C}$                                                                                                                                                                                                                                                                                                                                                                                                                                                       |
