# Supplementary material for: A quantitative modelling approach to zebrafish pigment pattern formation
Source: eLife journal article supplement (doi:10.7554/elife.52998), 2020-07-27
Supplement: supp3 [file elife-52998-supp3-v1.pdf]

Supplementary File 3: SL measurements and HAA measurements and WT pattern description by stage are given as by [1]. Corresponding dpf for the stages are approximated from the images of Frohnhöfer *et al* [2].

| Stage | SL (mm) | HAA (mm) | WT pattern description                         | $\approx$ dpf |
|-------|---------|----------|------------------------------------------------|---------------|
| PB    | 7.2     | 0.83     | Faint strip of dense S-iridophores at center   | 21            |
| PR    | 8.6     | 1.2      | Loose S-iridophores spreading across 1D and 1V | 30            |
| SP    | 9.6     | 1.46     | Dense S-iridophores present in X1V and X1D     | 39            |
| SA    | 10.4    | 1.7      | X1D and X1V forming                            | 44            |
| J     | 11      | 2.05     | 2V and 2D faint                                | 51            |
| J+    | 13.5    | 2.5      | 2V and 2D forming                              | 70            |
| J++   | 16      | 3        | 2V and 2D formed                               | -             |

## 1 References

- 2 [1] D. M. Parichy, M. R. Elizondo, M. G. Mills, T. N. Gordon, and E. Engeszer.  
3 Normal Table of Post-Embryonic Zebrafish Development: Staging by Ex-  
4 ternally Visible Anatomy of the Living Fish. *Dev. Dyn.*, 238(12):2975–3015,  
5 2011.
- 6 [2] H. G. Frohnhofer, J. Krauss, H.-M. Maischein, and C. Nusslein-Volhard.  
7 Iridophores and their interactions with other chromatophores are required  
8 for stripe formation in zebrafish. *Development*, 140(14):2997–3007, 2013.
