# Supplementary material for: A quantitative modelling approach to zebrafish pigment pattern formation
Source: eLife journal article supplement (doi:10.7554/elife.52998), 2020-07-27
Supplement: supp4 [file elife-52998-supp4-v1.pdf]

Supplementary File 4: All continuous time events and their corresponding propensities for event attempts at time  $t$ , denoted  $\alpha_i(t)$  for event  $i$  in minutes.

| $i$ | Event                               | Event description                                                                                   | $\alpha_i(t)$                                                                                                        | Assumption based on an average WT fish                                                                                                                                                           |
|-----|-------------------------------------|-----------------------------------------------------------------------------------------------------|----------------------------------------------------------------------------------------------------------------------|--------------------------------------------------------------------------------------------------------------------------------------------------------------------------------------------------|
| 1   | Movement of $M$ .                   | A cell of type $M$ is chosen to attempt movement.                                                   | $\frac{0.11N^M_I(t)}{0.04 \times 60 \times 24 \times 7}$                                                             | $M$ move at a rate of 0.11mm per week [1].                                                                                                                                                       |
| 2   | Movement of $X^b$ .                 | A cell of type $X^b$ is chosen to attempt movement.                                                 | $\frac{0.033N^{X^b}(t)}{0.02 \times 60 \times 24 \times 7}$                                                          | $X^b$ move at a rate of 0.033mm per week [2].                                                                                                                                                    |
| 3   | Movement of $X$ .                   | A cell of type $X$ is chosen to attempt movement.                                                   | $\frac{0.033N^X(t)}{0.02 \times 60 \times 24 \times 7}$                                                              | $X$ move at a rate of 0.033mm per week [2].                                                                                                                                                      |
| 4   | Movement of $I^d$ .                 | A cell of type $I^d$ is chosen to attempt movement.                                                 | $\frac{0.03N^{I^d}(t)}{0.02 \times 60 \times 24}$                                                                    | $I^d$ migrate extensively [3]. We propose that they move at a rate of 0.03mm per day.                                                                                                            |
| 5   | Movement of $I^l$ .                 | A cell of type $I^l$ is chosen to attempt movement.                                                 | $\frac{0.03N^{I^l}(t)}{0.02 \times 60 \times 24}$                                                                    | $I^l$ migrate extensively [3]. We propose that they move at a rate of 0.03mm per day.                                                                                                            |
| 6   | Proliferation of $X$ or $X^b$ .     | A cell of type $X$ or $X^b$ is chosen to attempt proliferation.                                     | $\frac{N^X(t) + N^{X^b}(t)}{60 \times 24 \times 7}$                                                                  | Cells of the xanthophore lineage proliferate continuously from the onset of metamorphosis with a doubling rate of once per week [4].                                                             |
| 7   | Proliferation of $I^d$ or $I^l$ .   | A cell of type $I^d$ or $I^l$ is chosen to attempt proliferation.                                   | $\frac{1.2N^{I^d}(t)}{60 \times 24} + \frac{1.2N^{I^l}(t)}{60 \times 24}$                                            | S-iridophores have a doubling time of 3-4 days [5]. We implement that they attempt proliferation 1.2 times per day.                                                                              |
| 8   | Differentiation of $M$ .            | A site in $M$ is chosen where a melanocyte progenitor attempts to differentiate into a melanocyte.  | $\frac{N^{I^d}(t)}{2 \times 60 \times 24} + \frac{N^{I^l}(t)}{10 \times 60 \times 24} + \frac{N^X(t)}{60 \times 24}$ | Xanthophores and iridophores promote the differentiation of melanocytes in the long range in different strengths [6, 7]. melanocytes also differentiate independently from other cell types [7]. |
| 9   | Differentiation of $X^b$ to $X$ .   | A cell of type $X^b$ is chosen to attempt differentiation into a cell of type $X$ .                 | $\frac{N^X(t)}{3 \times 60 \times 24}$                                                                               | We propose that $X^b$ attempt differentiation once every three days.                                                                                                                             |
| 10  | Transition of $I^d$ to $I^l$ .      | A cell of type $I^d$ is chosen to attempt transition to a cell of type $I^l$ .                      | $\frac{N^{I^d}(t)}{60 \times 24}$                                                                                    | We propose that $I^d$ attempt transition once per day.                                                                                                                                           |
| 11  | Transition of $I^l$ to $I^d$ .      | A cell of type $I^l$ is chosen to attempt transition to a cell of type $I^d$ .                      | $\frac{N^{I^l}(t)}{60 \times 24}$                                                                                    | We propose that $I^l$ attempt transition once per day.                                                                                                                                           |
| 12  | Melanocyte death.                   | A cell of type $M$ is chosen to attempt death.                                                      | $\frac{N^M(t)}{60 \times 24}$                                                                                        | We propose that melanocytes may die at least once per day.                                                                                                                                       |
| 13  | Xanthoblast pulls a melanocyte      | A cell of type $X^b$ near to cell of type $M$ successfully pulls a cell of type $M$ towards itself. | $\frac{N^{X^b}(t)}{100 \times 60 \times 24}$                                                                         | We propose that this is successful 1/100 times per day.                                                                                                                                          |
| 14  | Growth in the horizontal direction. | The domain is chosen to grow in the horizontal direction.                                           | $\frac{0.13}{0.04 \times 60 \times 24}$                                                                              | Growth in the horizontal direction is 0.13mm per day [8].                                                                                                                                        |
| 15  | Growth in the vertical direction.   | The domain is chosen to grow in the vertical direction.                                             | $\frac{0.033}{0.04 \times 60 \times 24}$                                                                             | Growth in the vertical direction is 0.033mm per day [8].                                                                                                                                         |

## 1 **References**

- 2 [1] G. Takahashi and S. Kondo. Melanophores in the stripes of adult zebrafish  
3 do not have the nature to gather, but disperse when they have the space to  
4 move. *Pigment Cell Melanoma Res.*, 21(6):677–686, 2008.
- 5 [2] H. Yamanaka and S. Kondo. In vitro analysis suggests that difference in cell  
6 movement during direct interaction can generate various pigment patterns  
7 in vivo. *PNAS*, 111(5):1867–1872, 2014.
- 8 [3] A. P. Singh, U. Schach, and C. Nüsslein-Volhard. Proliferation, dispersal and  
9 patterned aggregation of iridophores in the skin prefigure striped colouration  
10 of zebrafish. *Nat. Cell Biol.*, 16(6):607–14, 2014.
- 11 [4] P. Mahalwar, B. Walderich, A. P. Singh, and C. Nüsslein-Volhard. Local  
12 reorganization of xanthophores fine-tunes and colors the striped pattern of  
13 zebrafish. *Science.*, 345(6202):1362–4, 2014.
- 14 [5] B. Walderich, A. P. Singh, P. Mahalwar, and C. Nüsslein-Volhard. Homo-  
15 typic cell competition regulates proliferation and tiling of zebrafish pigment  
16 cells during colour pattern formation. *Nat. Commun.*, 7:11462, 2016.
- 17 [6] A. Nakamasu, G. Takahashi, A. Kanbe, and S. Kondo. Interactions between  
18 zebrafish pigment cells. *PNAS*, 106(21):8429–8434, 2009.
- 19 [7] H. G. Frohnhof, J. Krauss, H.-M. Maischein, and C. Nusslein-Volhard.  
20 Iridophores and their interactions with other chromatophores are required  
21 for stripe formation in zebrafish. *Development*, 140(14):2997–3007, 2013.
- 22 [8] D. M. Parichy, E. M. Mellgren, J. F. Rawls, S. S. Lopes, R. N. Kelsh, and  
23 S. L. Johnson. Mutational analysis of endothelin receptor b1 (rose) during  
24 neural crest and pigment pattern development in the zebrafish *Danio rerio*.  
25 *Dev. Bio.*, 227(2):294–306, 2000.
