# Supplementary material for: A quantitative modelling approach to zebrafish pigment pattern formation
Source: eLife journal article supplement (doi:10.7554/elife.52998), 2020-07-27
Supplement: supp5 [file elife-52998-supp5-v1.pdf]

Supplementary File 5: Full description of all the cell-cell interaction given in main text. All interactions are referenced in Appendix 1. Melanocytes, xanthophores, loose iridophores, dense iridophores and xanthoblasts are denoted  $M$ ,  $X$ ,  $I^l$ ,  $I^d$ ,  $X^b$  respectively. C1, C2 stands for cell 1, cell 2, where C1 =  $X$ ,  $X^b$  is the target cell and cell 2 is the signalling cell with corresponding signal range (R) that is either short (S), up to 0.04mm, or long (L), 0.12mm. This signal generates action (A) of cell type C1 of: movement (M), differentiation (D), proliferation (P) or survival (S) of type (T). For action (D) or (S), type (T) is denoted '+' if the resultant action is promotion of action A and '-' if the resultant action is inhibition of action (A). For action (M), type (T) is denoted '+' if the resultant action is attraction towards cell type C1 and '-' if the resultant action is repulsion away from cell type C1. \*Melanocytes can also differentiate randomly, independent of any other cell type.

| C1    | C2    | A | R | T | Basis of assumption                                          | Details                                                                                                                                                                                                        | Ref.   |
|-------|-------|---|---|---|--------------------------------------------------------------|----------------------------------------------------------------------------------------------------------------------------------------------------------------------------------------------------------------|--------|
| $I^l$ | $M$   | S | - | - | Adult <i>pfe</i> , <i>shd</i> , <i>nac</i> and WT fish.      | $I^l$ are typically spaced at a distance from each other.                                                                                                                                                      | [1]    |
| $X$   | $M$   | S | + | + | WT fish development.                                         | Arrival of $I^d$ leads to compaction of $X$ overlaying this region.                                                                                                                                            | [2]    |
| $I^d$ | $X$   | M | S | + | Adult <i>pfe</i> , <i>shd</i> , <i>nac</i> and WT fish.      | $X$ and $I^d$ are highly associated with each other.                                                                                                                                                           | [1]    |
| $M$   | $M$   | S | S | - | Long term imaging of WT fish                                 | $M$ appear to migrate to dense $I^d$ free zones.                                                                                                                                                               | [3]    |
| $I^d$ | $M$   | S | S | - | Adult <i>pfe</i> , <i>shd</i> , <i>nac</i> and WT fish.      | $I^d$ are typically not associated with $M$ .                                                                                                                                                                  | [1]    |
| $X$   | $M$   | S | S | + | Cultured WT $M$ and $X$ .                                    | <i>In vitro</i> , $X$ extended pseudopodia towards $M$ which they then followed towards $M$ .                                                                                                                  | [4]    |
| $M$   | $X$   | S | S | - | Regeneration experiments performed <i>in vivo</i> on WT fish | When $X$ in close proximity to $M$ in the pale interstripes, $M$ move out of interstripe, versus when the $X$ in close proximity to $M$ are ablated. Then $M$ are less likely to leave the interstripe region. | [5]    |
| $M$   | $X^b$ | M | L | + | Long term imaging of WT fish                                 | $X^b$ in stripes exhibit airnemes which attach to $M$ activating Delta-Notch signalling and resulting in the consolidation of $M$ into stripes.                                                                | [6, 7] |
| $I^d$ | $M$   | D | S | - | Observations of WT fish.                                     | $M$ typically differentiate in $I^d$ free zones.                                                                                                                                                               | [3]    |
| $I^d$ | $M$   | D | L | + | Observations of <i>pfe</i> mutants and WT                    | $M$ differentiation is associated with one stripe width distance away from the central strip of $I^d$ .                                                                                                        | [1]    |
| $X$   | $M$   | D | S | - | Regeneration experiments <i>in vivo</i> on WT fish.          | $M$ and $X$ compete to differentiate in the S range.                                                                                                                                                           | [4]    |
| $X$   | $M$   | S | L | + | Regeneration experiments <i>in vivo</i> on WT fish.          | Increased $M$ death when $X$ ablated from neighbouring pale interstripes.                                                                                                                                      | [4, 8] |
| $X$   | $M$   | S | S | - | Regeneration experiments <i>in vivo</i> on WT fish.          | When $X$ in close proximity to $M$ , some $M$ die versus when $X$ in close proximity to $M$ are ablated, no $M$ die.                                                                                           | [5, 9] |
| $X$   | $M$   | D | L | + | Regeneration experiments <i>in vivo</i> on WT fish.          | $M$ regeneration proportional to neighbouring pale interstripe X number.                                                                                                                                       | [4, 8] |

| C1    | C2    | A | R | T | Basis of assumption                                 | Details                                                                                                                             | Ref.       |
|-------|-------|---|---|---|-----------------------------------------------------|-------------------------------------------------------------------------------------------------------------------------------------|------------|
| $M$   | $M$   | D | L | - | Regeneration experiments <i>in vivo</i> on WT fish. | $M$ regeneration negatively proportional to $M$ at half a stripe width distance.                                                    | [4]        |
| $M$   | $M$   | S | L | - | Regeneration experiments <i>in vivo</i> on WT fish. | $M$ regeneration negatively proportional to $M$ at half a stripe width distance (when $X$ ablated from neighbouring inter-stripes). | [4]        |
| $I^l$ | $M$   | S | S | + | Observations of <i>pfe</i> fish.                    | We predict that loose S-iridophores promote $M$ survival as this would account for the aggregates of $M$ s observed in <i>pfe</i> . | [10, 1]    |
| *     | $M$   | D |   |   | Observation of double mutant <i>nac;pfe</i> fish.   | <i>nac;pfe</i> are unable to generate $X$ s or iridophores, yet readily generate $M$ .                                              | [1]        |
| $X^b$ | $I^d$ | D | S | + | S-iridophore expression studies.                    | $I^d$ express xanthogenic Colony stimulating factor-1 (Csf1) which is essential for $X^b$ differentiation.                          | [3, 1, 11] |
| $X^b$ | $X$   | P | S | + | Regeneration experiments <i>in vivo</i> on WT fish. | $M$ and $X$ compete to differentiate in the short range.                                                                            | [4]        |
| $X^b$ | $M$   | D | S | - | Regeneration experiments <i>in vivo</i> on WT fish. | $M$ and $X$ compete to differentiate in the short range.                                                                            | [4]        |
| $X$   | $I^d$ | P | S | + | S-iridophore expression studies.                    | $I^d$ express xanthogenic Colony stimulating factor-1 (Csf1) which is essential for $X$ proliferation and survival.                 | [3, 1, 11] |
| $X$   | $M$   | P | S | - | Regeneration experiments <i>in vivo</i> on WT fish. | $M$ and $X$ compete to differentiate in the short range.                                                                            | [4]        |
| $X$   | $X$   | P | S | + | Regeneration experiments <i>in vivo</i> on WT fish. | $M$ and $X$ compete to differentiate in the short range.                                                                            | [4]        |
| $X$   |       | P |   |   | Clonal analyses of $X$ lineage.                     | $X$ and $X^b$ observed to proliferate at a rate of approximately 1/week.                                                            | [2]        |
| $X^b$ |       | P |   |   | Clonal analyses of $X$ lineage.                     | $X$ and $X^b$ observed to proliferate at a rate of approximately 1/week.                                                            | [2]        |

## 1 References

- 2 [1] H. G. Frohnhof, J. Krauss, H.-M. Maischein, and C. Nüsslein-Volhard.  
3 Iridophores and their interactions with other chromatophores are required  
4 for stripe formation in zebrafish. *Development*, 140(14):2997–3007, 2013.
- 5 [2] P. Mahalwar, B. Walderich, A. P. Singh, and C. Nüsslein-Volhard. Local  
6 reorganization of xanthophores fine-tunes and colors the striped pattern of  
7 zebrafish. *Science.*, 345(6202):1362–4, 2014.
- 8 [3] L. B. Patterson and D. M. Parichy. Interactions with Iridophores and  
9 the Tissue Environment Required for Patterning Melanophores and Xan-  
10 thophores during Zebrafish Adult Pigment Stripe Formation. *PLoS Genet.*,  
11 9(5), 2013.
- 12 [4] A. Nakamasu, G. Takahashi, A. Kanbe, and S. Kondo. Interactions between  
13 zebrafish pigment cells. *PNAS*, 106(21):8429–8434, 2009.
- 14 [5] G. Takahashi and S. Kondo. Melanophores in the stripes of adult zebrafish  
15 do not have the nature to gather, but disperse when they have the space  
16 to move. *Pigment Cell Melanoma Res.*, 21(6):677–686, 2008.
- 17 [6] D. S. Eom, E. J. Bain, L. B. Patterson, M. E. Grout, and D. M. Parichy.  
18 Long-distance communication by specialized cellular projections during pig-  
19 ment pattern development and evolution. *eLife*, 4(December 2015):1–25,  
20 2015.
- 21 [7] D. S. Eom and D. M. Parichy. A macrophage relay for long-distance signal-  
22 ing during postembryonic tissue remodeling. *Science*, 355(6331):1317–1320,  
23 2017.
- 24 [8] S. Kondo and M. Watanabe. Black, yellow, or silver: Which one leads skin  
25 pattern formation? *Pigment Cell Melanoma Res.*, 28(1):2–4, 2015.
- 26 [9] H. Yamanaka and S. Kondo. In vitro analysis suggests that difference in cell  
27 movement during direct interaction can generate various pigment patterns  
28 in vivo. *PNAS*, 111(5):1867–1872, 2014.
- 29 [10] C. B. Kimmel, W.W. Ballard, S. R. Kimmel, B. Ullmann, and T. F.  
30 Schilling. Stages of embryonic development of the zebrafish. *Dev. Dyn.*,  
31 203(3):253–310, 1995.
- 32 [11] B. Walderich, A. P. Singh, P. Mahalwar, and C. Nüsslein-Volhard. Homo-  
33 typic cell competition regulates proliferation and tiling of zebrafish pigment  
34 cells during colour pattern formation. *Nat. Commun.*, 7:11462, 2016.
