# Supplementary material for: A quantitative modelling approach to zebrafish pigment pattern formation
Source: eLife journal article supplement (doi:10.7554/elife.52998), 2020-07-27
Supplement: supp6 [file elife-52998-supp6-v1.pdf]

Supplementary File 6: Parameters implemented in the model.

| Sym.             | Value | Units          | Description                                                                                                 | Reference                                                                                                                   |
|------------------|-------|----------------|-------------------------------------------------------------------------------------------------------------|-----------------------------------------------------------------------------------------------------------------------------|
| $L$              | 0.24  | mm             | Long range cell-cell (filopodia) interaction radius.                                                        | Long interactions are approximately the length of half of the adult stripe width [1].                                       |
| $S$              | 0.4   | mm             | Short range cell-cell interaction radius.                                                                   | Short range interactions are with neighbouring cells.                                                                       |
| $a_{MM}$         | 0     | None           | Attraction bias $M$ to $M$ .                                                                                | Melanocytes neither attract nor repulse other melanophores [2].                                                             |
| $a_{MX}$         | 0     | None           | Attraction bias $M$ to $X$ .                                                                                | Melanocytes are repelled by xanthophores in the short range [2, 3].                                                         |
| $a_{MI^d}$       | 0     | None           | Attraction bias $M$ to $I^d$ .                                                                              | Melanocytes and iridophores mutually repulse each other in the short range [4].                                             |
| $r_{MM}$         | 0     | None           | Repulsion bias $M$ to $M$ .                                                                                 | Melanocytes neither attract nor repel other melanocytes [2].                                                                |
| $r_{MX}$         | 100   | None           | Repulsion bias $M$ to $X$ .                                                                                 | Melanocytes are repelled by xanthophores in the short range [2, 3].                                                         |
| $r_{MI^d}$       | 30    | None           | Repulsion bias $M$ to $I^d$ .                                                                               | Melanocytes and iridophores mutually repel each other in the short range [4].                                               |
| $a_{XM}$         | 10    | None           | Attraction bias $X$ to $M$ .                                                                                | Xanthophores 'chase' melanocytes in the short range [3].                                                                    |
| $a_{XX}$         | 0     | None           | Attraction bias $X$ to $X$ .                                                                                | No known interaction between xanthophores.                                                                                  |
| $a_{XI^d}$       | 1000  | None           | Attraction bias $X$ to $I^d$ .                                                                              | Iridophores attract xanthophores in the short range [4].                                                                    |
| $r_{XM}$         | 5     | None           | Repulsion bias $X$ to $M$ .                                                                                 | Xanthophores 'chase' melanocytes in the short range [3].                                                                    |
| $a_{I^dX}$       | 300   | None           | Attraction bias $I^d$ to $X$ .                                                                              | Predict that xanthophores mutually promote the consolidation of dense iridophores in the interstripe.                       |
| $a_{I^dI^d}$     | 0     | None           | Attraction bias $I^d$ to $I^d$ .                                                                            | No known interaction between dense iridophores.                                                                             |
| $r_{I^dM}$       | 10    | None           | Repulsion bias $I^d$ to $M$ .                                                                               | Melanocytes and iridophores mutually repel each other in the short range [4].                                               |
| $r_{I^dX}$       | 0     | None           | Repulsion bias $I^d$ to $X$ .                                                                               | Predict that xanthophores mutually promote the consolidation of dense iridophores in the interstripe.                       |
| $r_{I^dI^d}$     | 0     | None           | Repulsion bias $I^d$ to $I^d$ .                                                                             | No known interaction between dense iridophores.                                                                             |
| $\alpha$         | 2.5   | None           | Scaling factor for melanocyte differentiation criteria.                                                     | Chosen so that melanocyte differentiation is only successful when there are more $X$ and $I^d$ in the long range than $M$ . |
| $\beta$          | 3     | None           | Lower bound for melanocyte differentiation (minimum number of $X$ and $I^d$ in the long range).             | Chosen so that melanocyte differentiation is only successful when there are some $X$ and $I^d$ in the long range.           |
| $\gamma$         | 3     | None           | Scaling factor for melanocyte differentiation (numbers of $X$ vs number of $M$ in short range).             | Chosen so that melanocyte differentiation is only successful when $X$ does not outcompete $M$ in the short range.           |
| $\kappa$         | 3     | None           | Upper bound of $I^d$ in the short range for melanocyte differentiation.                                     | Chosen so that melanocyte differentiation is only successful when $I^d$ is limited in the short range.                      |
| $L_{\text{sb}}$  | 12    | None           | Lower bound for xanthophore number in the long range to promote iridophore transition from dense to loose.  | Optimised for stripe formation.                                                                                             |
| $S_{\text{sb}}$  | 9     | None           | Upper bound for xanthophore number in the short range to promote iridophore transition from dense to loose. | Optimised for stripe formation.                                                                                             |
| $S_m$            | 1     | None           | Lower bound for melanocyte number in the short range to promote iridophore transition from dense to loose.  | Optimised for stripe formation.                                                                                             |
| $L_{\text{sr}2}$ | 16    | None           | Upper bound for xanthophore number in the long range to promote iridophore transition from loose to dense.  | Optimised for stripe formation.                                                                                             |
| $S_{\text{sr}2}$ | 4     | None           | Lower bound for xanthophore number in the short range to promote iridophore transition from loose to dense. | Optimised for stripe formation.                                                                                             |
| $S_{m2}$         | 12    | None           | Lower bound for melanocyte number in the short range to promote iridophore transition from loose to dense.  | Optimised for stripe formation.                                                                                             |
| $\sigma$         | 3     | None           | Scaling factor for melanocyte death (number of $M$ compared to number of $X$ ).                             | Chosen so that $M$ die when they are surrounded by $X$ .                                                                    |
| $\omega$         | 3     | None           | Lower bound for number of $I^d$ in the short range to promote $M$ death.                                    | Chosen so that $M$ die when they are surrounded by $I^d$ .                                                                  |
| $h$              | 5     | cell diameters | Aireneme length (used in determining set $P$ ).                                                             | Airenemes reach up to several cell diameters (>0.15 mm). [5]                                                                |

## 1 **References**

- 2 [1] A. Nakamasu, G. Takahashi, A. Kanbe, and S. Kondo. Interactions between  
3 zebrafish pigment cells. *PNAS*, 106(21):8429–8434, 2009.
- 4 [2] G. Takahashi and S. Kondo. Melanophores in the stripes of adult zebrafish  
5 do not have the nature to gather, but disperse when they have the space to  
6 move. *Pigment Cell Melanoma Res.*, 21(6):677–686, 2008.
- 7 [3] H. Yamanaka and S. Kondo. In vitro analysis suggests that difference in cell  
8 movement during direct interaction can generate various pigment patterns  
9 in vivo. *PNAS*, 111(5):1867–1872, 2014.
- 10 [4] L. B. Patterson and D. M. Parichy. Interactions with Iridophores and the Tis-  
11 sue Environment Required for Patterning Melanophores and Xanthophores  
12 during Zebrafish Adult Pigment Stripe Formation. *PLoS Genet.*, 9(5), 2013.
- 13 [5] D. S. Eom and D. M. Parichy. A macrophage relay for long-distance signal-  
14 ing during postembryonic tissue remodeling. *Science*, 355(6331):1317–1320,  
15 2017.
